# Supplementary material for: Fluorescent carbon dots for the sensitive detection of Cr(vi) in aqueous media and their application in test papers
Source: Royal Society of Chemistry journal article supplement (doi:10.1039/c6ra19977a), 2016-01-01
Supplement: c6ra19977a1.pdf [file c6ra19977a1.pdf]

## Supporting Information

### **Fluorescent carbon dots for sensitive detection of Cr(VI) in aqueous media and its application in test papers**

Lingli Bu, Jingdong Peng\*, Huanjun Peng, Shaopu Liu, Huan Xiao, Dan Liu, Ziyu Pan, Yu Chen, Fang Chen, Yan He

School of Chemistry and Chemical Engineering, Southwest University, No.2 Tiansheng Road, Beibei District, Chongqing 400715, People's Republic of China

E-mail: [hxpengjd@swu.edu.cn](mailto:hxpengjd@swu.edu.cn);

Fax: +86-23-68254000

**Table S1** Comparison of different analysis methods for Cr(VI) detection.

| Detection methods  | Materials                                             | Linear range<br>( $\mu\text{M}$ ) | Detection limit<br>( $\mu\text{M}$ ) | Ref.      |
|--------------------|-------------------------------------------------------|-----------------------------------|--------------------------------------|-----------|
| Colorimetric assay | DPC- AuNPs                                            | 0.05–20                           | 0.3                                  | 10        |
| Fluorescence       | SiQDs@PAMAM-OH                                        | 25–128                            | 0.2                                  | 41        |
| Electrochemistry   | Ti/TiO <sub>2</sub> NT/Au electrode                   | 0.10–105                          | 0.03                                 | 42        |
| Fluorescence       | Cu-NCs                                                | 0.2–60                            | 0.065                                | 43        |
| Fluorescence       | Hydrophilic ionic compound                            | 5.0–1400                          | 0.89                                 | 44        |
| Fluorescence       | CdTe quantum dots                                     | 0.2–20                            | 154                                  | 45        |
| Electrochemistry   | Fe <sub>3</sub> O <sub>4</sub> /MoS <sub>2</sub> /GCE | 0.5–328                           | 0.5                                  | 46        |
| Fluorescence       | Carbon dots                                           | 1.0–400                           | 0.24                                 | This work |

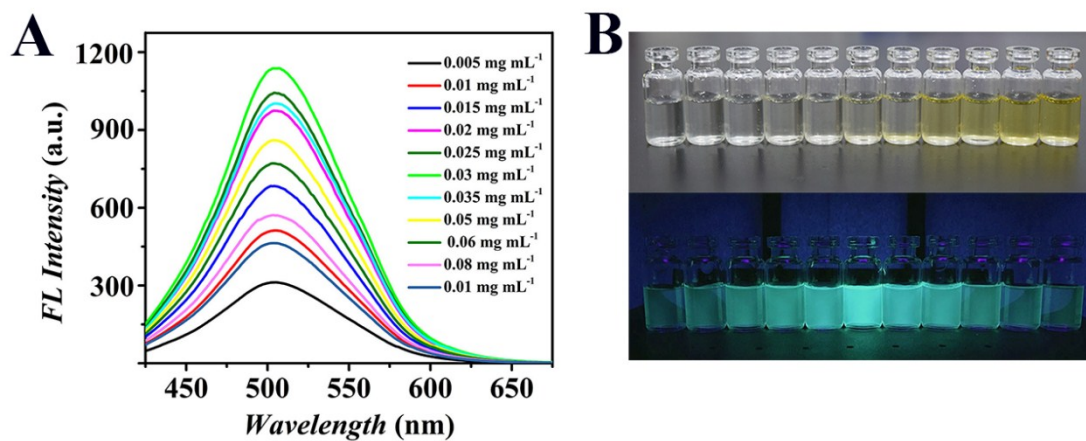

**Figure. S1** (A) Fluorescence emission spectra of PCDs at different concentrations from 0.005 to 0.01 mg mL<sup>-1</sup>. (B) Photographs of different concentrations of PCDs solution (from left to right: 0.005, 0.01, 0.015, 0.02, 0.025, 0.03, 0.035, 0.05, 0.06, 0.08, 0.1 mg mL<sup>-1</sup>) taken under white light (top) and under 365 nm UV light (bottom).
